# Supplementary material for: Effects of high-intensity interval training and moderate-intensity continuous training on glycaemic control and skeletal muscle mitochondrial function in db/db mice
Source: PubMed Central journal article supplement (PMC5427962; doi:10.1038/s41598-017-00276-8), 2017-03-16
Supplement: 41598_2017_276_MOESM1_ESM.pdf [file 41598_2017_276_MOESM1_ESM.pdf]

Vivien Chavanelle, Nathalie Boisseau, Yolanda F. Otero, Lydie Combaret, Dominique Dardevet,  
Christophe Montaurier, Geoffrey Delcros, Sébastien Peltier, Pascal Sirvent

**Effects of high-intensity interval training and moderate-intensity continuous training on glycaemic control  
and skeletal muscle mitochondrial function in db/db mice**

**Figure S1**

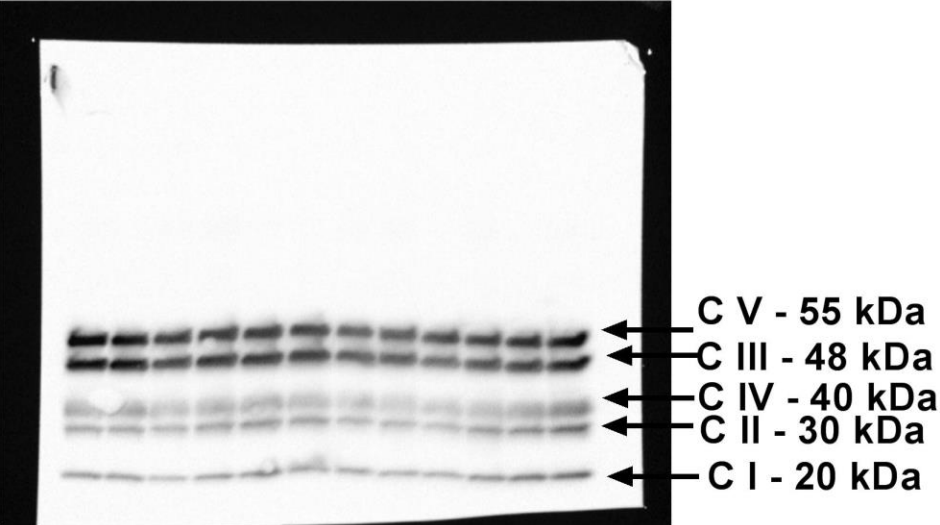

**AMPK  
(62 kDa)**

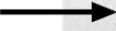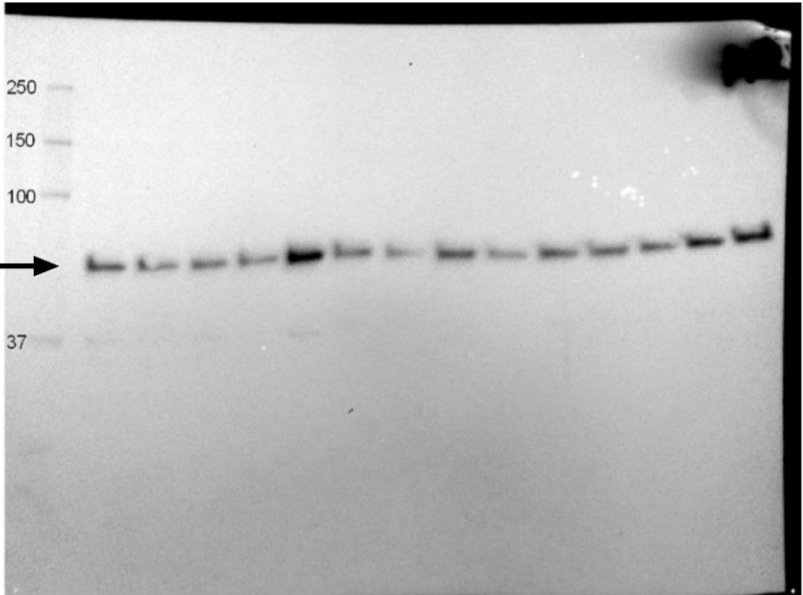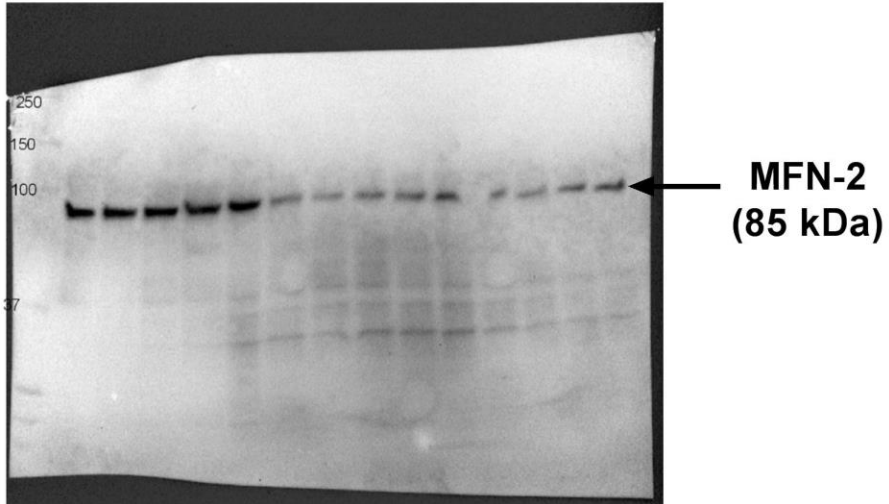

**p-AMPK  
(62 kDa)**

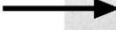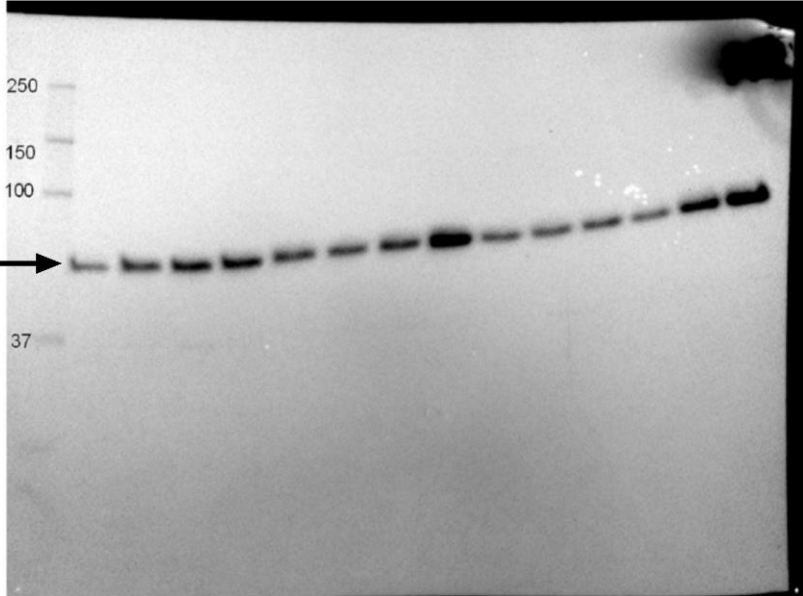

**Figure S2**

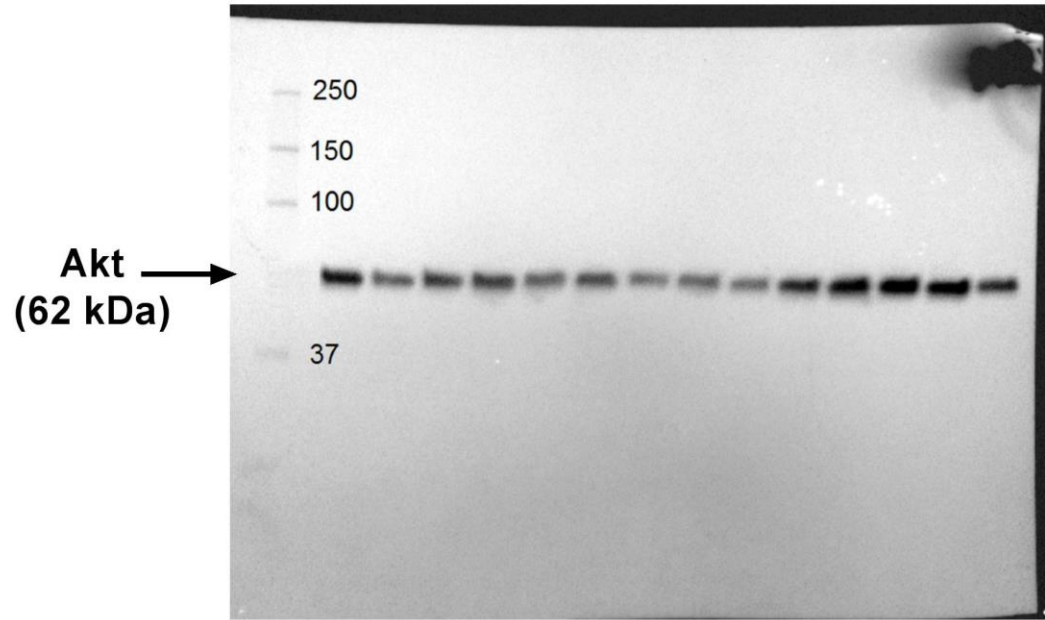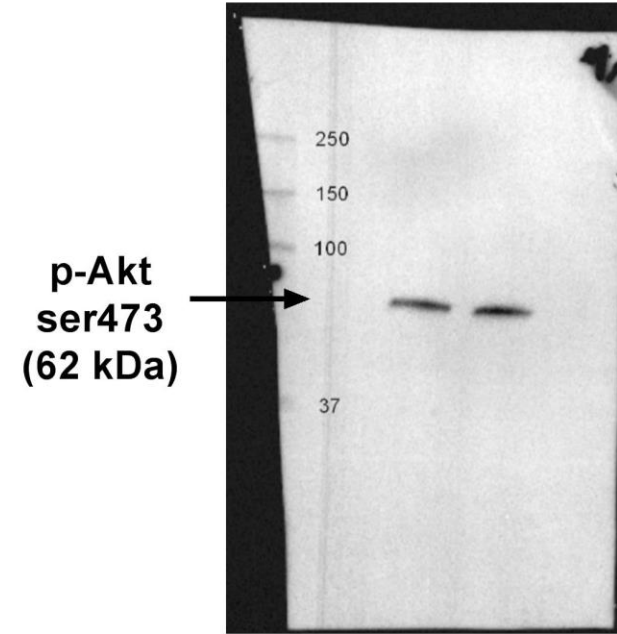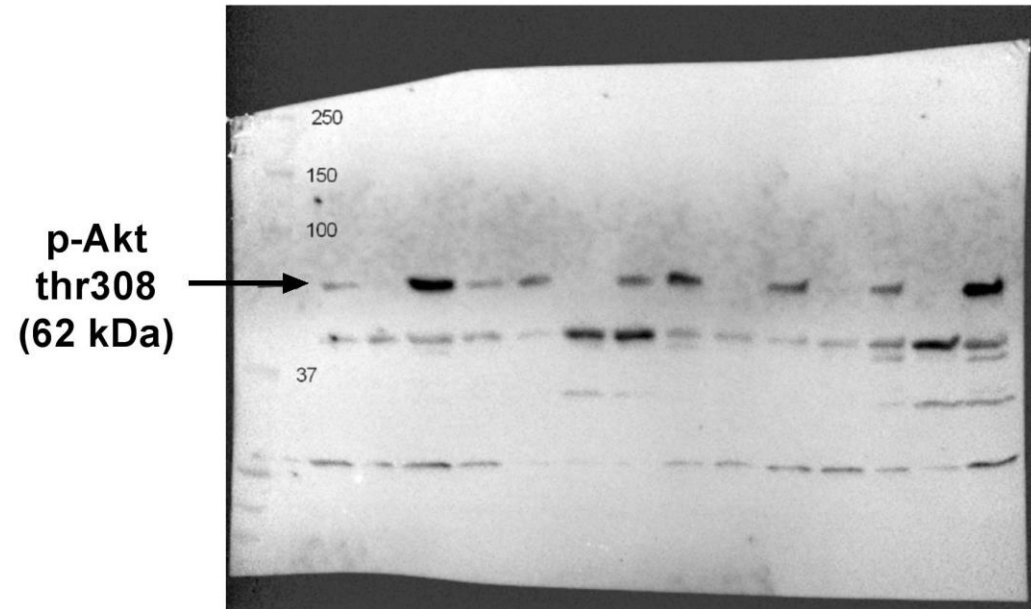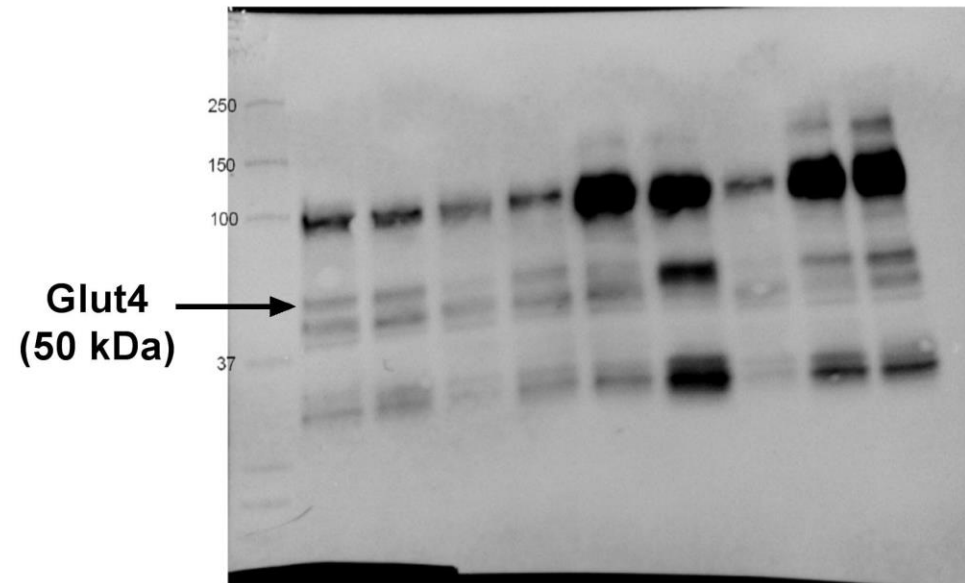

# Supplementary figures legend

- Supplementary figure S1: Full scans of panel from Figure 2. Chemiluminescent signals were detected and recorded by exposure of the membranes in a Bio-Rad ChemiDoc system, and band densities were determined using image-analysis software (Image Lab V5.0, Bio-Rad, USA).
- Supplementary figure S2: Full scans of panel from Figure 4. Chemiluminescent signals were detected and recorded by exposure of the membranes in a Bio-Rad ChemiDoc system, and band densities were determined using image-analysis software (Image Lab V5.0, Bio-Rad, USA).
